# Supplementary material for: Oxalate-assisted assembly of two polyoxotantalate supramolecular frameworks with proton conduction properties
Source: Royal Society of Chemistry journal article supplement (doi:10.1039/d2cc07027h), 2023-01-01
Supplement: d2cc07027h1.pdf [file d2cc07027h1.pdf]

## *Electronic supplementary information*

# **Oxalate-assisted assembly of two polyoxotantalate supramolecular frameworks with proton conduction property**

*Yong Yu,<sup>a</sup> Rong-Da Lai,<sup>a</sup> Cai Sun,<sup>a</sup> Yan-Qiong Sun,<sup>a</sup> Qing-Xin Zeng,<sup>a</sup> Xin-Xiong Li<sup>\*ab</sup> and Shou-Tian Zheng<sup>\*a</sup>*

<sup>a</sup> *Fujian Provincial Key Laboratory of Advanced Inorganic Oxygenated Materials, College of Chemistry, Fuzhou University, Fuzhou 350108, Fujian, China.*

<sup>b</sup> *Key Laboratory of Advanced Energy Materials Chemistry (Ministry of Education), Nankai University, Tianjin, 300071, China*

E-mail: [lx@fzu.edu.cn](mailto:lx@fzu.edu.cn); [stzheng@fzu.edu.cn](mailto:stzheng@fzu.edu.cn)

### **This file includes:**

**Section S1**    Syntheses and Methods

**Section S2**    Additional Tables

**Section S3**    Additional Figures

## Section S1: Syntheses and Methods

### 1. Characterization Methods

**Materials and General methods:** All the other reactants and solvents were obtained from commercial sources and used for reactions without further purification. Powder X-ray diffraction (PXRD) patterns were measured using a Rigaku Ultima IV diffractometer with Cu-K $\alpha$  radiation ( $\lambda = 1.5418 \text{ \AA}$ ) in the range 5-50 $^\circ$  IR spectra were recorded on PerkinElmer Spectrum One FT-IR infrared spectrophotometer with pressed KBr pellets in the range of 4000-500  $\text{cm}^{-1}$ . The UV-vis spectra were collected on a SHIMADZU UV-2600 UV-visible spectrophotometer by using the BaSO<sub>4</sub> as the blank. Simulated XRD data were simulated by the Mercury Software with the step of 0.02 $^\circ$  from 5 $^\circ$  to 50 $^\circ$  ( $\lambda=1.54056\text{\AA}$ ). Thermal analyses were performed from 30  $^\circ\text{C}$  to 800  $^\circ\text{C}$  in a dynamic air atmosphere with a heating rate of 10  $^\circ\text{C}/\text{min}$ , using a NETZSCH STA 449C thermal analyzer. N<sub>2</sub> and water vapor adsorption capacities were tested by using Micromeritics ASAP (Accelerated Surface Area and Porosimetry) 2020 system. Energy dispersive spectrometry (EDS) analyses were performed using a Hirox SH-4000 M type desktop scanning electron microscope.

**Single-crystal structure analysis:** Crystals data of **1** and **2** were collected on Bruker Apex Duo CCD diffractometer equipped with a fine focus, 2.0 kW sealed tube X-ray source (MoK $\alpha$  radiation,  $\lambda = 0.71073 \text{ \AA}$ ) operating at 175 K. Structures were solved by direct methods followed by successive difference Fourier methods. The structures of **1** and **2** were solved through direct methods and refined by full-matrix least-squares refinements based on  $F^2$  adopting the SHELXTL program package. All non-H atoms were located with successive difference Fourier syntheses and refined anisotropically. The contribution of disordered solvent molecules to the overall intensity data of structures was treated using the SQUEEZE method in PLATON. The cobalt complex (Co5) in **1** is disordered over two positions. The crystallographic data of **1** and **2** was summarized in Table S6. CCDC 2231766 and 2231765 contain supplementary structural information for **1** and **2**.

**Proton Conduction measurement:** Ac impedance measurements were carried out with a SI 1260 IMPEDANCE/GAINPHASE analyzer over the frequency range from 0.1 Hz to 10 MHz with an applied voltage of 50 mV. The relative humidity was controlled by a STIKCorp CIHI-150BS3

incubator. The test sample was pressed to form a cylindrical pellet of crystalline powder sample (~1mm thickness × 5mm diameter) coated with C-pressed electrodes, and both sides of the sample pellet were attached to two silver electrodes. The self-made device containing a cylindrical pellet was placed in a constant temperature & humidity incubator before testing in a temperature range from 25 °C to 85 °C and relative humidity between 55% -98%.

## 2. Syntheses

**Synthesis of  $\text{H}[\text{Co}^{\text{III}}(\text{en})_3]_3[\text{Co}^{\text{III}}(\text{en})_2\text{O}](\text{C}_2\text{O}_4)\{\text{Ta}_6\text{O}_{19}\}_2[\text{Co}^{\text{III}}(\text{C}_2\text{O}_4)(\text{H}_2\text{O})_2]_2[\text{Co}^{\text{III}}(\text{en})(\text{H}_2\text{O})]_2 \cdot 41\text{H}_2\text{O}$  (1):** A mixture of  $\text{Na}_8[\text{Ta}_6\text{O}_{19}] \cdot 24.5\text{H}_2\text{O}$  (**Ta<sub>6</sub>**) (0.12 g),  $\text{K}_2\text{C}_2\text{O}_4$  (0.09 g),  $\text{CoC}_2\text{O}_4$  (0.08 g), 0.05 mL en (en=ethylenediamine), and 6 mL of  $\text{C}_2\text{H}_3\text{N} / \text{H}_2\text{O}$  (1:5) ( $\text{C}_2\text{H}_3\text{N}$  = Acetonitrile) (pH = 10.4) was stirred in a 20 mL vial, and then heated at 80 °C for 3 days, finally cooled to room temperature. After washing with ethanol, brown strip crystals were obtained. Yield: 19 mg (11.8% based on **Ta<sub>6</sub>**). IR (KBr pellet,  $\nu/\text{cm}^{-1}$ , Fig. S10): 3210(s), 1631(m), 1384(w), 1309(s), 1159(s), 1054(w), 865(s), 730(s), 547(m).

**Synthesis of  $[\text{Co}^{\text{III}}(\text{en})_3]_4\text{C}_2\text{O}_4\{\text{Ta}_6\text{O}_{19}[\text{Co}^{\text{III}}(\text{en})]\}_2 \cdot 66\text{H}_2\text{O}$  (2):** A mixture of  $\text{Na}_8[\text{Ta}_6\text{O}_{19}] \cdot 24.5\text{H}_2\text{O}$  (**Ta<sub>6</sub>**) (0.12 g),  $\text{K}_2\text{C}_2\text{O}_4$  (0.09 g),  $\text{CoC}_2\text{O}_4$  (0.08 g), 0.05 mL en (en=ethylenediamine), and 6 mL  $\text{Na}_2\text{CO}_3/\text{NaHCO}_3$  buffer solution (pH = 10.0) was stirred in a 20 mL vial, and then heated at 80 °C for 3 days, finally cooled to room temperature. After being washed with ethanol, green bar crystals were obtained. Yield: 30 mg ( 19.9% based on **Ta<sub>6</sub>**). IR (KBr pellet,  $\nu/\text{cm}^{-1}$ , Fig. S10): 3280(s), 1644(m), 1386(w), 1322(s), 1159(s), 1058(w), 856(s), 730(s), 547(m).

## Section S2 Additional Tables

**Table S1** Bond lengths and valence band summations of cobalt atoms in **1**.

| Atom<br>1 | Atom<br>2 | R <sub>ij</sub> | R <sub>0</sub> | B    | S <sub>ij</sub> | SUM        |
|-----------|-----------|-----------------|----------------|------|-----------------|------------|
| Co1       | N9        | 1.977(12)       | 1.62           | 0.4  | 0.43241004      |            |
|           | N10       | 1.947(12)       | 1.62           | 0.4  | 0.46442630      |            |
|           | O2        | 1.961(8)        | 1.65           | 0.4  | 0.48167956      |            |
|           | O3        | 1.954(8)        | 1.65           | 0.4  | 0.48977483      |            |
|           | O17       | 1.997(8)        | 1.65           | 0.4  | 0.44211268      |            |
|           | O3W       | 1.955(11)       | 1.65           | 0.4  | 0.48941346      | 2.79981    |
| Co2       | N2        | 1.941(9)        | 1.62           | 0.4  | 0.47023448      |            |
|           | N3        | 1.972(9)        | 1.62           | 0.4  | 0.43677664      |            |
|           | N4        | 1.962(9)        | 1.62           | 0.4  | 0.44730087      |            |
|           | N5        | 1.962(10)       | 1.62           | 0.4  | 0.44815369      |            |
|           | N6        | 1.980(9)        | 1.62           | 0.4  | 0.42853581      |            |
|           | N7        | 1.975(10)       | 1.62           | 0.4  | 0.43449474      | 2.66549    |
|           | Co3       | O6              | 2.020(7)       | 1.65 | 0.4             | 0.41865240 |
| O9        |           | 2.089(8)        | 1.65           | 0.4  | 0.35514181      |            |
| O13       |           | 2.080(8)        | 1.65           | 0.4  | 0.36283411      |            |
| O21       |           | 2.014(8)        | 1.65           | 0.4  | 0.42457497      |            |
| O1W       |           | 2.149(9)        | 1.65           | 0.4  | 0.30779129      |            |
| O2W       |           | 2.158(10)       | 1.65           | 0.4  | 0.30184032      | 2.17083    |
| Co4       | N1        | 1.952(10)       | 1.62           | 0.4  | 0.45895205      |            |
|           | N1        | 1.952(10)       | 1.62           | 0.4  | 0.45895205      |            |
|           | N8        | 1.966(9)        | 1.62           | 0.4  | 0.44306108      |            |
|           | N8        | 1.966(9)        | 1.62           | 0.4  | 0.44306108      |            |
|           | N11       | 1.961(9)        | 1.62           | 0.4  | 0.44836714      |            |
|           | N11       | 1.961(9)        | 1.62           | 0.4  | 0.44836714      | 2.70076    |
| Co5       | N13       | 1.91(2)         | 1.62           | 0.4  | 0.50734124      |            |
|           | N14       | 2.11(2)         | 1.62           | 0.4  | 0.31513256      |            |
|           | N12       | 1.87(2)         | 1.62           | 0.4  | 0.55803514      |            |
|           | N15       | 1.81(2)         | 1.62           | 0.4  | 0.64372981      |            |
|           | O11       | 1.964(18)       | 1.65           | 0.4  | 0.47916307      |            |
|           | O11       | 2.066(18)       | 1.65           | 0.4  | 0.37584764      | 2.87924    |

**Table S2** Hydrogen Bond Lengths (Å) and Bond Angles (°) in **1**

| No | D-H | H...O | D...O | <(DH)O | Hydrogen bonds |
|----|-----|-------|-------|--------|----------------|
|----|-----|-------|-------|--------|----------------|

|    |         |        |           |        |                  |
|----|---------|--------|-----------|--------|------------------|
| 1  | 0.91    | 2.29   | 3.019(13) | 137.3  | N1-H1A...O5      |
| 2  | 0.91    | 2.21   | 3.016(12) | 146.7  | N1-H1A...O7      |
| 3  | 0.91    | 2.56   | 2.990(13) | 109.8  | N1-H1A...O15     |
| 4  | 0.91    | 2.06   | 2.955(13) | 165.6  | N2-H2A...O9      |
| 5  | 0.91    | 1.92   | 2.800(11) | 162.7  | N2-H2B...O4#1    |
| 6  | 0.91    | 2.1    | 3.004(13) | 175.7  | N3-H3A...O24#5   |
| 7  | 0.91    | 2.19   | 3.013(11) | 149.4  | N3-H3B...O16#1   |
| 8  | 0.91    | 2.65   | 3.331(13) | 132.6  | N4-H4A...O24#5   |
| 9  | 0.91    | 2.17   | 3.060(13) | 166.9  | N4-H4A...O25#5   |
| 10 | 0.91    | 2.07   | 2.944(11) | 160    | N4-H4B...O16#6   |
| 11 | 0.91    | 2.66   | 3.307(13) | 128.7  | N5-H5A...O9      |
| 12 | 0.91    | 2.08   | 2.955(13) | 161.8  | N5-H5A...O20     |
| 13 | 0.91    | 1.94   | 2.841(13) | 170.7  | N5-H5B...O10#6   |
| 14 | 0.91    | 2.24   | 3.062(13) | 149.9  | N6-H6A...O18#7   |
| 15 | 0.91    | 2.31   | 3.132(12) | 150.2  | N6-H6B...O5#6    |
| 16 | 0.91    | 2.52   | 3.283(11) | 141.1  | N6-H6B...O10#6   |
| 17 | 0.91    | 2.35   | 3.069(14) | 135.8  | N7-H7A...O18#7   |
| 18 | 0.91    | 2.16   | 2.960(13) | 146.3  | N7-H7A...O20#7   |
| 19 | 0.91    | 1.96   | 2.839(12) | 163.1  | N8-H8C...O7      |
| 20 | 0.91    | 1.97   | 2.854(13) | 162    | N8-H8D...O24#3   |
| 21 | 0.91    | 2.19   | 2.974(15) | 143.6  | N9-H9A...O6      |
| 22 | 0.91    | 2.13   | 3.036(14) | 173.2  | N9-H9B...O8#1    |
| 23 | 0.91    | 2.2    | 3.038(15) | 152.9  | N10-H10B...O26   |
| 24 | 0.91    | 2.07   | 2.948(12) | 161.1  | N11-H11A...O16#2 |
| 25 | 0.91    | 1.97   | 2.871(12) | 171.7  | N11-H11B...O25   |
| 26 | 0.99411 | 2.6839 | 3.337(15) | 123.67 | C2-H2D...O24#5   |
| 27 | 0.99    | 2.59   | 3.310(15) | 129.9  | C3-H3D...O9      |
| 28 | 0.99    | 2.6    | 3.491(14) | 149.7  | C4-H4C...O25#5   |
| 29 | 0.99    | 2.56   | 3.36(2)   | 138.6  | C6-H6C...O7W#6   |
| 30 | 0.99    | 2.64   | 3.549(15) | 153.1  | C6-H6D...O20     |
| 31 | 0.99    | 2.5    | 3.404(14) | 151.7  | C7-H7C...O20#7   |
| 32 | 0.99    | 2.61   | 3.198(16) | 118    | C8-H8B...O18#7   |
| 33 | 0.99    | 2.42   | 3.405(16) | 171.9  | C9-H9D...O22     |
| 34 | 0.99    | 2.35   | 3.262(16) | 152.1  | C11-H11D...O24#8 |
| 35 | 0.99    | 2.57   | 3.33(2)   | 133.6  | C14-H14C...O25#2 |
| 36 | 0.91    | 2.14   | 2.99(2)   | 155.5  | N12-H12C...O17#4 |
| 37 | 0.91    | 2.25   | 3.07(3)   | 149.7  | N13-H13C...O12   |
| 38 | 0.91    | 2.35   | 3.02(2)   | 130.5  | N13-H13C...O23   |

|                         |        |         |           |        |                  |
|-------------------------|--------|---------|-----------|--------|------------------|
| 39                      | 0.91   | 2       | 2.89(2)   | 165.3  | N14-H14A...O26#4 |
| 40                      | 0.91   | 1.92    | 2.78(2)   | 157.5  | N14-H14B...O18   |
| 41                      | 0.99   | 2.3     | 3.07(3)   | 134.3  | C16-H16B...O13#4 |
| 42                      | 0.99   | 2.73    | 3.26(3)   | 113.5  | C17-H17A...O13#4 |
| 43                      | 0.99   | 2.44    | 3.32(3)   | 147.2  | C17-H17A...O18#4 |
| 44                      | 0.99   | 2.58    | 3.39(3)   | 138.7  | C19-H19B...O13   |
| 45                      | 0.85   | 2.65    | 3.15(3)   | 119.3  | O11-H11...O13    |
| 46                      | 0.9589 | 2.80911 | 2.997(14) | 91.96  | O1W-H1WA...O3W   |
| 47                      | 0.9589 | 2.21414 | 2.725(15) | 112.38 | O1W-H1WA...O4W   |
| 48                      | 0.95   | 1.93    | 2.873(16) | 172.3  | O2W-H2WA...O8W   |
| 49                      | 0.95   | 2.32    | 3.013(13) | 129.3  | O3W-H3WB...O1#1  |
| 50                      | 0.95   | 2.58    | 3.073(15) | 112.3  | O3W-H3WB...O21   |
| <b>Symmetric codes:</b> |        |         |           |        |                  |
| #1 -x+1/2,-y+1/2,-z,    |        |         |           |        |                  |
| #2 -x+1,y,-z+1/2,       |        |         |           |        |                  |
| #3 -x+1,-y+1,-z,        |        |         |           |        |                  |
| #4 -x+1/2,-y+1/2,-z+1,  |        |         |           |        |                  |
| #5 x-1/2,y-1/2,z        |        |         |           |        |                  |
| #6 -x+1/2,y-1/2,-z+1/2, |        |         |           |        |                  |
| #7 x,-y,z-1/2,          |        |         |           |        |                  |
| #8 x,-y+1,z+1/2         |        |         |           |        |                  |

**Table S3** Bond lengths and valence band summations of cobalt atoms in **2**.

| Atom <sub>1</sub> | Atom <sub>2</sub> | R <sub>ij</sub> | R <sub>0</sub> | B    | S <sub>ij</sub> | SUM      |
|-------------------|-------------------|-----------------|----------------|------|-----------------|----------|
| Co1               | O9                | 1.884(8)        | 1.655          | 0.42 | 0.576401        | □        |
| □                 | N13               | 1.938(12)       | 1.625          | 0.42 | 0.48168         | □        |
| □                 | N14               | 1.949(9)        | 1.625          | 0.42 | 0.468001        | □        |
| □                 | O8                | 1.957(12)       | 1.655          | 0.42 | 0.500026        | □        |
| □                 | O2                | 1.959(8)        | 1.655          | 0.42 | 0.482828        | □        |
| □                 | O3                | 1.976(8)        | 1.655          | 0.42 | 0.459718        | 2.968652 |
| Co2               | N12               | 1.937(14)       | 1.625          | 0.42 | 0.48444         | □        |
| □                 | N2                | 1.936(13)       | 1.625          | 0.42 | 0.478024        | □        |
| □                 | N8                | 1.941(11)       | 1.625          | 0.42 | 0.474734        | □        |
| □                 | N10               | 1.950(12)       | 1.625          | 0.42 | 0.46467         | □        |
| □                 | N6                | 1.986(11)       | 1.625          | 0.42 | 0.450615        | □        |
| □                 | N11               | 1.980(14)       | 1.625          | 0.42 | 0.427313        | 2.779795 |
| Co3               | N3                | 1.949(14)       | 1.625          | 0.42 | 0.467221        | □        |
| □                 | N4                | 1.955(13)       | 1.625          | 0.42 | 0.449008        | □        |
| □                 | N7                | 1.957(12)       | 1.625          | 0.42 | 0.447514        | □        |
| □                 | N9                | 1.961(13)       | 1.625          | 0.42 | 0.432843        | □        |
| □                 | N5                | 1.973(14)       | 1.625          | 0.42 | 0.430376        | □        |
| □                 | N1                | 1.976(13)       | 1.625          | 0.42 | 0.418952        | 2.645914 |

**Table S4** Hydrogen Bond Lengths ( Å ) and Bond Angles ( ° ) in **2**

| No. | D-H  | H...O | D...O     | <(DHO) | Hydrogen bonds   |
|-----|------|-------|-----------|--------|------------------|
| 1   | 0.89 | 2     | 2.839(18) | 157.1  | N1-H1D...O13     |
| 2   | 0.89 | 2.3   | 3.103(15) | 149.5  | N2-H2A...O4      |
| 3   | 0.89 | 2.66  | 3.154(15) | 116.4  | N2-H2A...O14     |
| 4   | 0.89 | 2.51  | 3.255(16) | 141.2  | N2-H2A...O15     |
| 5   | 0.89 | 2.6   | 3.35(3)   | 142    | N3-H3C...O5W     |
| 6   | 0.89 | 1.91  | 2.796(15) | 176    | N3-H3D...O16#3   |
| 7   | 0.89 | 2.43  | 3.22(2)   | 148.3  | N4-H4A...O5W     |
| 8   | 0.89 | 2.12  | 2.934(16) | 151.6  | N4-H4B...O13     |
| 9   | 0.89 | 1.93  | 2.800(19) | 167.3  | N5-H5C...O20#4   |
| 10  | 0.89 | 2.21  | 3.016(16) | 150.2  | N5-H5D...O11     |
| 11  | 0.89 | 2.01  | 2.837(16) | 153.7  | N6-H6A...O11#5   |
| 12  | 0.89 | 2.11  | 2.976(18) | 164.9  | N6-H6B...O2W#6   |
| 13  | 0.89 | 2.02  | 2.881(17) | 161.9  | N7-H7C...O21#3   |
| 14  | 0.89 | 2.21  | 3.090(15) | 169.1  | N7-H7D...O10#3   |
| 15  | 0.89 | 2.14  | 2.940(17) | 149.8  | N8-H8A...O10     |
| 16  | 0.89 | 2.01  | 2.889(18) | 170.9  | N8-H8B...O21     |
| 17  | 0.89 | 2.65  | 3.085(17) | 110.9  | N9-H9A...O18#3   |
| 18  | 0.89 | 2.16  | 2.948(16) | 147.9  | N9-H9B...O15#3   |
| 19  | 0.89 | 2.5   | 3.184(15) | 133.9  | N9-H9B...O16#3   |
| 20  | 0.89 | 2.49  | 3.223(14) | 140.7  | N10-H10A...O3#5  |
| 21  | 0.89 | 2.48  | 3.279(15) | 150.3  | N10-H10A...O12#5 |
| 22  | 0.89 | 2.11  | 2.991(14) | 169.6  | N11-H11A...O4    |
| 23  | 0.89 | 2.01  | 2.871(15) | 163.6  | N12-H12A...O12#5 |
| 24  | 0.89 | 2     | 2.861(18) | 162.8  | N12-H12B...O20   |
| 25  | 0.89 | 2.18  | 3.009(16) | 155.4  | N13-H13B...O7    |
| 26  | 0.89 | 2.35  | 3.069(16) | 137.4  | N14-H14A...O11   |
| 27  | 0.89 | 2.2   | 3.079(18) | 167.7  | N14-H14B...O2W#1 |
| 28  | 0.97 | 2.56  | 3.051(14) | 111.4  | C2-H2C...O2#6    |
| 29  | 0.97 | 2.5   | 3.40(2)   | 153.7  | C4-H4C...O21#3   |
| 30  | 0.97 | 2.5   | 3.36(2)   | 147.1  | C6-H6C...O20#4   |
| 31  | 0.97 | 2.64  | 3.45(2)   | 141.5  | C8-H8C...O17#3   |
| 32  | 0.97 | 2.57  | 3.41(2)   | 145.1  | C9-H9C...O19     |

**Symmetric codes:**

#1  $-x, -y+2, -z$ , #2  $-x+1/2, -y+3/2, -z+1$ , #3  $-x+1/2, y+1/2, -z+1/2$ , #4  $x, -y+2, z-1/2$ ,  
 #5  $x, -y+2, z+1/2$ , #6  $-x, y, -z+1/2$

**Table S5** The proton conductivity of known high-dimensional porous POM-based proton conducting materials

| <b>Compounds</b>                                                                                                                                                                                                                                                                                | <b>Conductivity<br/>[S cm<sup>-1</sup>]</b> | <b>Condition<br/>(Temp., RH)</b> | <b>Ref</b> |
|-------------------------------------------------------------------------------------------------------------------------------------------------------------------------------------------------------------------------------------------------------------------------------------------------|---------------------------------------------|----------------------------------|------------|
| H <sub>14</sub> [Na <sub>6</sub> (H <sub>2</sub> O) <sub>12</sub> ] <sub>4</sub> [K <sub>42</sub> Ge <sub>8</sub> W <sub>72</sub> O <sub>272</sub> (H <sub>2</sub> O) <sub>60</sub> ] <sub>2</sub> ·solvent                                                                                     | 6.80 × 10 <sup>-2</sup> S cm <sup>-1</sup>  | 85 °C, 98% RH                    | S1         |
| [Co(en) <sub>3</sub> ] <sub>2</sub> C <sub>2</sub> O <sub>4</sub> {Ta <sub>6</sub> O <sub>19</sub> [Co(en)(H <sub>2</sub> O)] <sub>2</sub> ·17H <sub>2</sub> O                                                                                                                                  | 5.76 × 10 <sup>-2</sup> S cm <sup>-1</sup>  | 85 °C, 98% RH                    | This work  |
| (Him) <sub>24</sub> (NH <sub>4</sub> ) <sub>20</sub> [Mo <sub>72</sub> <sup>VI</sup> Mo <sub>60</sub> <sup>VO</sup> O <sub>372</sub> (CH <sub>3</sub> COO) <sub>30</sub> (H <sub>2</sub> O) <sub>72</sub> ] <sub>2</sub> ·190H <sub>2</sub> O                                                   | 5.00 × 10 <sup>-2</sup> S cm <sup>-1</sup>  | 60 °C 98% RH                     | S2         |
| K <sub>8</sub> Na <sub>3</sub> Li <sub>5</sub> {[Na(NO <sub>3</sub> )(H <sub>2</sub> O)] <sub>4</sub> [Al <sub>16</sub> (OH) <sub>24</sub> (H <sub>2</sub> O) <sub>8</sub> (P <sub>8</sub> W <sub>48</sub> O <sub>184</sub> )] <sub>2</sub> ·66H <sub>2</sub> O                                 | 4.50 × 10 <sup>-2</sup> S cm <sup>-1</sup>  | 85 °C, 70% RH                    | S3         |
| Na <sub>5</sub> [H <sub>7</sub> (N(CH <sub>2</sub> PO <sub>3</sub> ) <sub>3</sub> )Mo <sub>6</sub> O <sub>16</sub> (OH)(H <sub>2</sub> O) <sub>4</sub> ] <sub>4</sub> ·18H <sub>2</sub> O                                                                                                       | 2.55 × 10 <sup>-2</sup> S cm <sup>-1</sup>  | 100 °C, 98% RH                   | S4         |
| [P <sub>2</sub> Mo <sub>5</sub> O <sub>23</sub> ][C <sub>7</sub> H <sub>7</sub> N <sub>2</sub> ] <sub>6</sub> ·H <sub>2</sub> O                                                                                                                                                                 | 1.91 × 10 <sup>-2</sup> S cm <sup>-1</sup>  | 50 °C, 98% RH                    | S5         |
| (TEAH) <sub>14</sub> Na <sub>10</sub> K <sub>8</sub> H <sub>8</sub> (P <sub>5</sub> W <sub>30</sub> ) <sub>2</sub> {Mo <sub>22</sub> Fe <sub>8</sub> ·50H <sub>2</sub> O                                                                                                                        | 1.70 × 10 <sup>-2</sup> S cm <sup>-1</sup>  | 95 °C 90% RH                     | S6         |
| [La <sub>3</sub> (H <sub>2</sub> O) <sub>22</sub> ][P <sub>2</sub> W <sub>15</sub> Ta <sub>3</sub> O <sub>62</sub> ] <sub>2</sub> ·16H <sub>2</sub> O                                                                                                                                           | 1.26 × 10 <sup>-2</sup> S cm <sup>-1</sup>  | 95 °C, 98% RH                    | S7         |
| H <sub>2</sub> [Cu(en) <sub>2</sub> (H <sub>2</sub> O) <sub>2</sub> ]{[Cu(en) <sub>2</sub> ] <sub>4</sub> [Cu(en)(Ta <sub>6</sub> O <sub>19</sub> )] <sub>2</sub> ·14H <sub>2</sub> O                                                                                                           | 1.04 × 10 <sup>-2</sup> S cm <sup>-1</sup>  | 75 °C, 98% RH                    | S8         |
| [Sm(H <sub>2</sub> O) <sub>5</sub> (CO <sub>2</sub> CH <sub>2</sub> NH <sub>3</sub> ) <sub>2</sub> ][Al(OH) <sub>6</sub> Mo <sub>6</sub> O <sub>18</sub> ] <sub>2</sub> ·10H <sub>2</sub> O                                                                                                     | 4.53 × 10 <sup>-3</sup> S cm <sup>-1</sup>  | 80 °C, 95% RH                    | S9         |
| [H <sub>3</sub> (3-PyBim) <sub>2</sub> ][PMo <sub>12</sub> O <sub>40</sub> ] <sub>2</sub> ·3.5H <sub>2</sub> O·CH <sub>3</sub> CN·CH <sub>3</sub> OH                                                                                                                                            | 3.34 × 10 <sup>-3</sup> S cm <sup>-1</sup>  | 100 °C, 98% RH                   | S10        |
| Na <sub>16</sub> (NH <sub>4</sub> ) <sub>10</sub> H <sub>8</sub> {[W <sub>14</sub> Ce <sup>IV</sup> O <sub>61</sub> ]{[W <sub>3</sub> Bi <sub>6</sub> Ce <sup>III</sup> (H <sub>2</sub> O) <sub>3</sub> O <sub>14</sub> ][BiW <sub>9</sub> O <sub>33</sub> ] <sub>2</sub> ·ca38H <sub>2</sub> O | 2.40 × 10 <sup>-3</sup> S cm <sup>-1</sup>  | 25 °C, 98% RH                    | S11        |
| [Co(bpz)(Hbpz)][Co(SO <sub>4</sub> ) <sub>0.5</sub> (H <sub>2</sub> O) <sub>2</sub> (bpz)] <sub>4</sub> [PMo <sup>VI</sup> <sub>8</sub> Mo <sup>V</sup> <sub>4</sub> V <sup>IV</sup> <sub>4</sub> O <sub>42</sub> ] <sub>2</sub> ·13H <sub>2</sub> O                                            | 1.50 × 10 <sup>-3</sup> S cm <sup>-1</sup>  | 75 °C, 98% RH                    | S12        |
| [M(H <sub>2</sub> O) <sub>8</sub> ][H(H <sub>2</sub> O) <sub>23</sub> ](HINO) <sub>4</sub> [PXO <sub>40</sub> ] (M=Zn, Mn, Cu; X=W, Mo)                                                                                                                                                         | 1.30 × 10 <sup>-3</sup> S cm <sup>-1</sup>  | 100 °C, 98% RH                   | S13        |
| H[Co(en) <sub>3</sub> ] <sub>3</sub> [Co(en) <sub>2</sub> O]C <sub>2</sub> O <sub>4</sub> {Ta <sub>6</sub> O <sub>19</sub> [Co(C <sub>2</sub> O <sub>4</sub> )(H <sub>2</sub> O) <sub>2</sub> ][Co(en)(H <sub>2</sub> O)] <sub>2</sub>                                                          | 1.00 × 10 <sup>-3</sup> S cm <sup>-1</sup>  | 85 °C, 98% RH                    | This work  |
| A <sub>2</sub> [Cr <sub>3</sub> O(OOCH) <sub>6</sub> (etpy) <sub>3</sub> ] <sub>2</sub> [aSiW <sub>12</sub> O <sub>40</sub> ] <sub>2</sub> ·nH <sub>2</sub> O                                                                                                                                   | 4.40 × 10 <sup>-4</sup> S cm <sup>-1</sup>  | 50 °C 95% RH                     | S14        |
| (H <sub>2</sub> en) <sub>4</sub> H <sub>2</sub> [V <sub>12</sub> B <sub>18</sub> O <sub>54</sub> (OH) <sub>6</sub> (H <sub>2</sub> O)] <sub>2</sub> ·11H <sub>2</sub> O                                                                                                                         | 1.90 × 10 <sup>-4</sup> S cm <sup>-1</sup>  | 60 °C 98% RH                     | S15        |



**Table S6** Crystallographic data of **1** and **2**

| <b>Compounds</b>                                                                                                                                                                                                                                                                  | <b>1</b>                                                                                          | <b>2</b>                                                                                           |
|-----------------------------------------------------------------------------------------------------------------------------------------------------------------------------------------------------------------------------------------------------------------------------------|---------------------------------------------------------------------------------------------------|----------------------------------------------------------------------------------------------------|
| <i>Empirical formula</i>                                                                                                                                                                                                                                                          | H <sub>177</sub> C <sub>32</sub> Co <sub>8</sub> N <sub>26</sub> O <sub>98</sub> Ta <sub>12</sub> | H <sub>218</sub> C <sub>30</sub> Co <sub>6</sub> N <sub>28</sub> O <sub>111</sub> Ta <sub>12</sub> |
| <i>formula weight</i>                                                                                                                                                                                                                                                             | 5137.83                                                                                           | 5273.29                                                                                            |
| <i>crystal system</i>                                                                                                                                                                                                                                                             | monoclinic                                                                                        | Monoclinic                                                                                         |
| <i>space group</i>                                                                                                                                                                                                                                                                | C2/c                                                                                              | C2/c                                                                                               |
| <i>a (Å)</i>                                                                                                                                                                                                                                                                      | 31.6228(8)                                                                                        | 37.181(13)                                                                                         |
| <i>b (Å)</i>                                                                                                                                                                                                                                                                      | 31.5888(7)                                                                                        | 18.194(6)                                                                                          |
| <i>c (Å)</i>                                                                                                                                                                                                                                                                      | 15.5673(3)                                                                                        | 24.574(9)                                                                                          |
| <i>α (°)</i>                                                                                                                                                                                                                                                                      | 90                                                                                                | 90                                                                                                 |
| <i>β (°)</i>                                                                                                                                                                                                                                                                      | 99.348(2)                                                                                         | 118.206(4)                                                                                         |
| <i>γ (°)</i>                                                                                                                                                                                                                                                                      | 90                                                                                                | 90                                                                                                 |
| <i>volume (Å<sup>3</sup>), Z</i>                                                                                                                                                                                                                                                  | 15344.1(6)                                                                                        | 14649(9)                                                                                           |
| <i>D<sub>calc</sub> (g/cm<sup>3</sup>)</i>                                                                                                                                                                                                                                        | 2.224                                                                                             | 2.391                                                                                              |
| <i>F(000)</i>                                                                                                                                                                                                                                                                     | 9708                                                                                              | 10080                                                                                              |
| <i>Temperature (K)</i>                                                                                                                                                                                                                                                            | 175                                                                                               | 175                                                                                                |
| <i>μ (mm<sup>-1</sup>)</i>                                                                                                                                                                                                                                                        | 9.454                                                                                             | 9.696                                                                                              |
| <i>θ range (°)</i>                                                                                                                                                                                                                                                                | 4.082 - 61.508                                                                                    | 3.762 - 51.764                                                                                     |
| <i>reflns collected / unique</i>                                                                                                                                                                                                                                                  | 55766 / 19080                                                                                     | 31805 / 13196                                                                                      |
| <i>restraints / parameters</i>                                                                                                                                                                                                                                                    | 352 / 703                                                                                         | 312 / 577                                                                                          |
| <i>completeness / %</i>                                                                                                                                                                                                                                                           | 99.3%                                                                                             | 97.5%                                                                                              |
| <i>GOF on F<sup>2</sup></i>                                                                                                                                                                                                                                                       | 1.011                                                                                             | 1.009                                                                                              |
| <i>R<sub>int</sub></i>                                                                                                                                                                                                                                                            | 0.0569                                                                                            | 0.0474                                                                                             |
| <i>R<sub>1</sub>, wR<sub>2</sub> [I &gt; 2σ(I)]</i>                                                                                                                                                                                                                               | R <sub>1</sub> = 0.0633, wR <sub>2</sub> = 0.1447                                                 | R <sub>1</sub> = 0.0549, wR <sub>2</sub> = 0.1512                                                  |
| <i>R<sub>1</sub>, wR<sub>2</sub> (all data)</i>                                                                                                                                                                                                                                   | R <sub>1</sub> = 0.0887, wR <sub>2</sub> = 0.1542                                                 | R <sub>1</sub> = 0.0760, wR <sub>2</sub> = 0.1610                                                  |
| $R_1^a = \sum  F_o  -  F_c  / \sum  F_o $ . $wR_2 = [\sum w(F_o^2 - F_c^2)^2 / \sum w(F_o^2)^2]^{1/2}$ , $w = 1 / [\sigma^2(F_o^2) + (xP)^2 + yP]$ , $P = (F_o^2 + 2F_c^2) / 3$ , where $x = 0.0773$ , $y = 309.1895$ for <b>1</b> ; $x = 0.0403$ , $y = 822.5073$ for <b>2</b> . |                                                                                                   |                                                                                                    |

## Section S3 Additional Figures

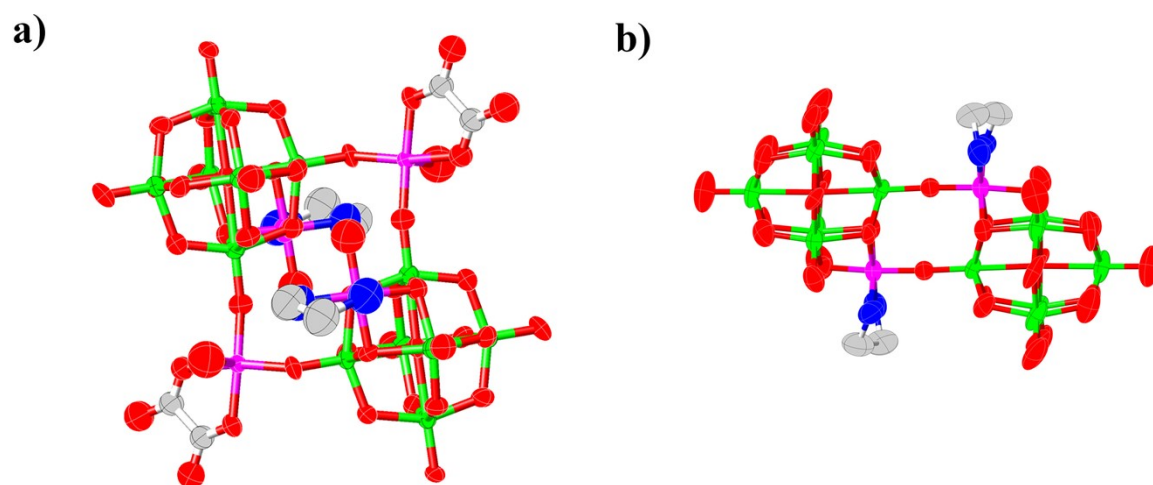

**Fig. S1** a) Ball-stick and ellipsoid diagrams of the SBU in compound **1**; b) Ball-stick and ellipsoid diagrams of the SBU in compound **2**.

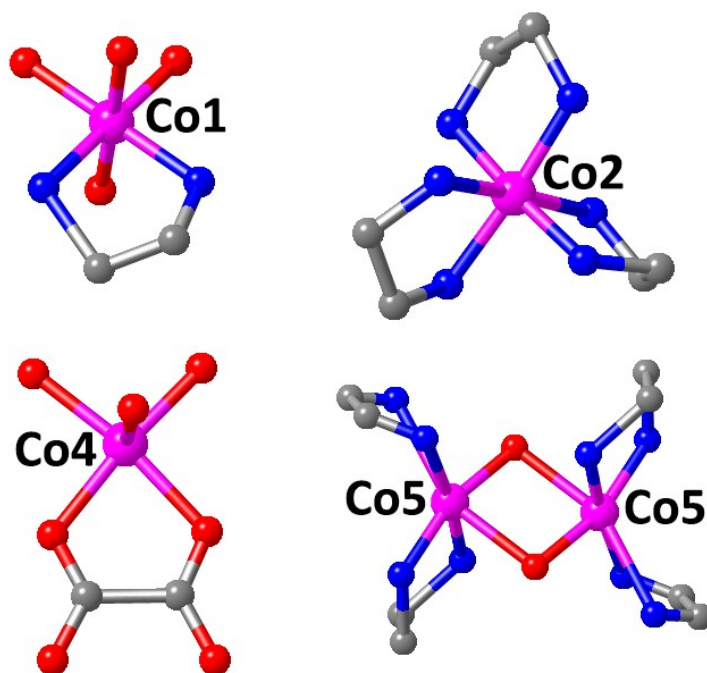

**Fig. S2** View of the coordination environments of the cobalt ions in **1**.

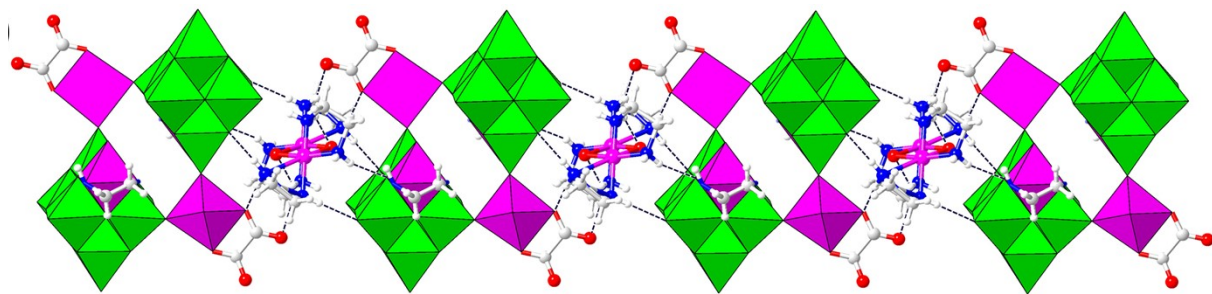

**Fig. S3** View of 1D chain built by the dimers  $\{Co_2Ta_6\}_2$  and  $[Co_2^{III}(\mu-O)_2(en)_4]$  complexes in **1**.

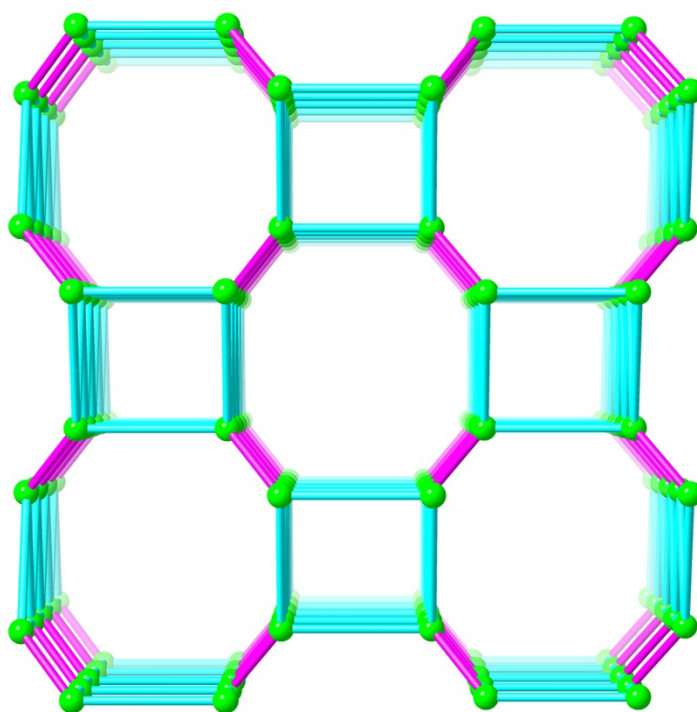

**Fig. S4** The topology of **1**. The  $\{Co_2Ta_6\}_2$  SBU (green) was simplified as a 5-connected node.

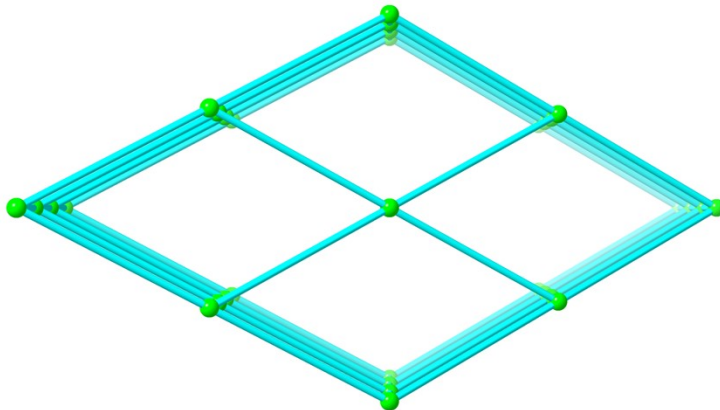

**Fig. S5** The topological graph of **2**.  $\{Co_2Ta_6\}_2$  SBU (green) as 6-connected nodes.

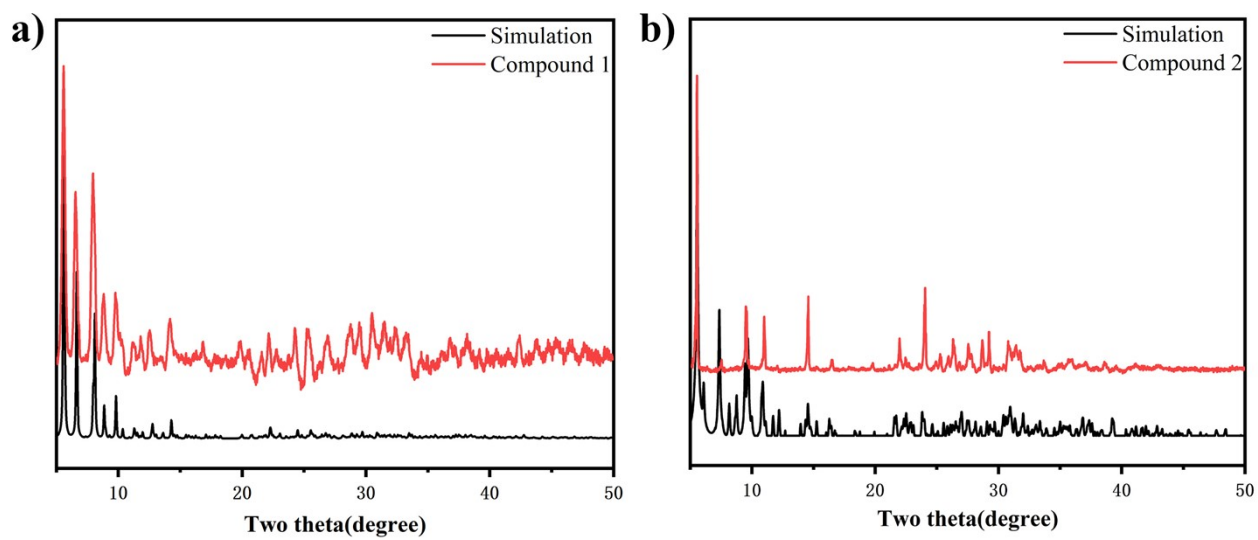

**Fig. S6** PXRD patterns of compounds **1** and **2**.

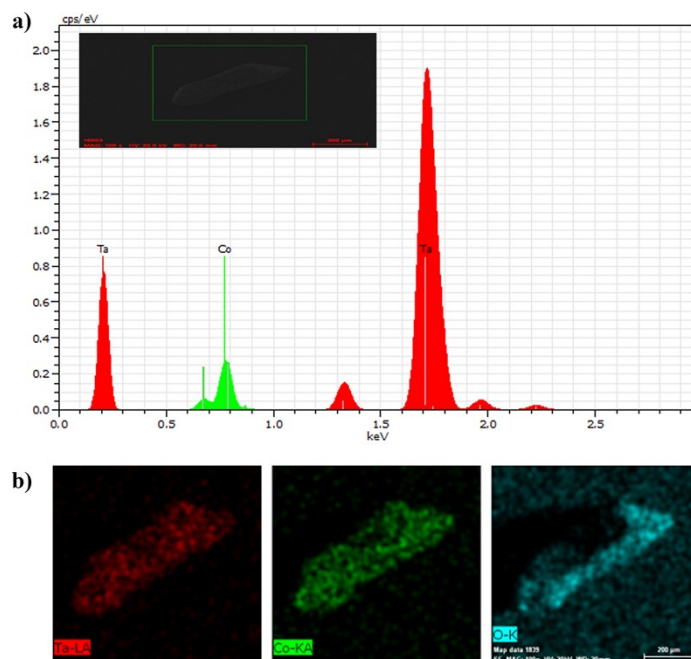

Fig. S7 a) EDS spectra for **1**; b) EDS-mapping for **1**.

EDS analyses of **1**

|       | Calc | Exp |
|-------|------|-----|
| Ta/Co | 1.62 | 1.5 |

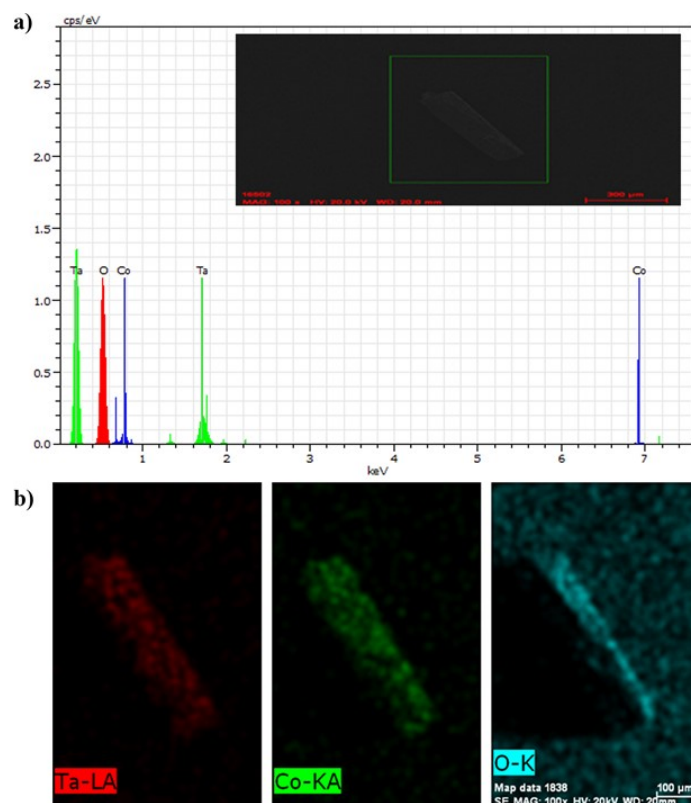

**Fig. S8** a) EDS spectra for **2**; b) EDS-mapping for **2**.

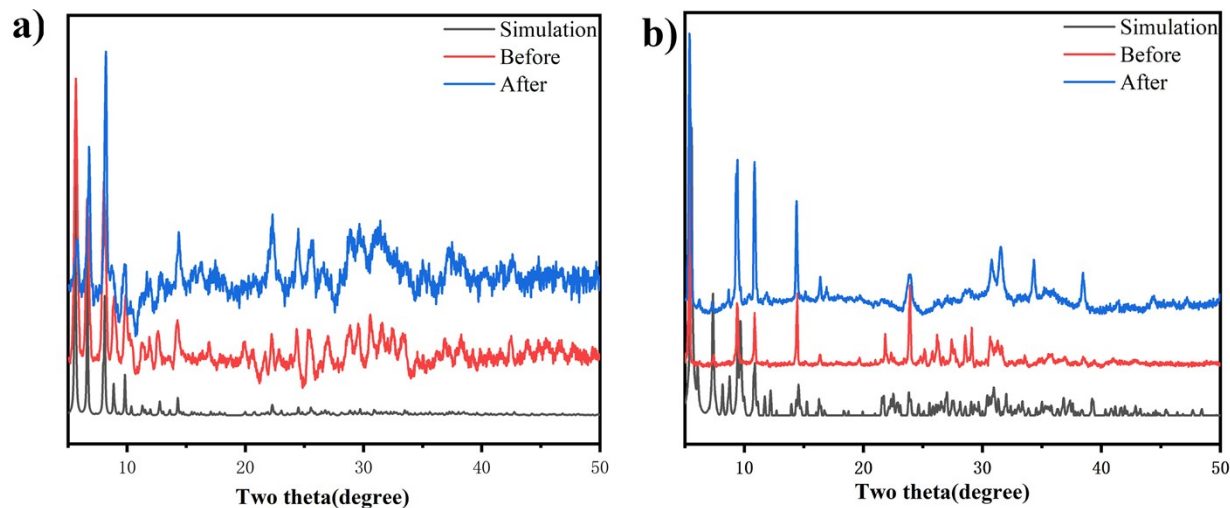

**Fig. S9** PXRD patterns of **1** and **2** after the proton conduction test.

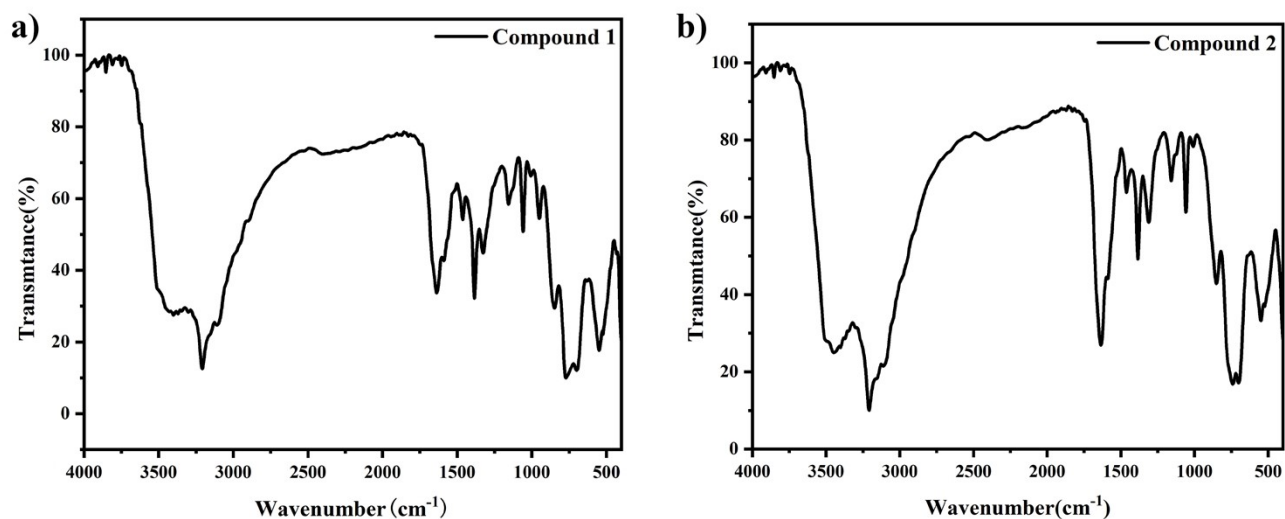

**Fig. S10** IR spectra of as-synthesized samples.

The broad absorption peak at  $3400\text{cm}^{-1}$  to  $3210\text{cm}^{-1}$  is attributed to the  $\nu$  (O-H) stretching vibration in the IR spectrum.  $\nu$  (C-H) and  $\nu$  (N-H) stretching vibrations occur at about  $3140\text{ cm}^{-1}$  and  $2930\text{ cm}^{-1}$ . These signals confirmed the presence of organic amine species in the product. The bands between  $1465\text{-}1324\text{ cm}^{-1}$  and around  $820\text{ cm}^{-1}$  are attributed to  $\nu\text{C-O}$  and  $\nu\text{C-C}$  oxalate symmetric stretching vibrations, respectively. The peaks at  $\tilde{\nu} = 1060\text{-}450\text{ cm}^{-1}$  are assigned to the  $\nu(\text{Ta-O}_t)$  and  $\nu(\text{Ta-O}_b\text{-M})$  stretching vibrations.

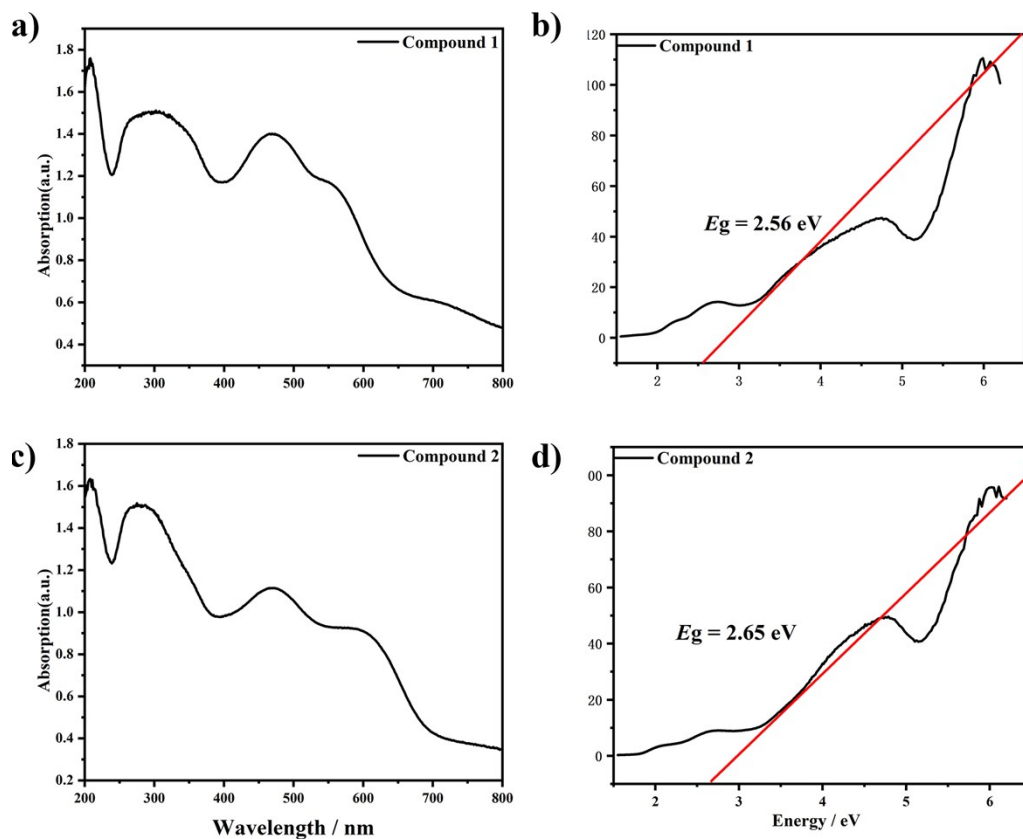

**Fig. S11** a-b) The UV-Vis absorption spectra and Kubelka-Munk Function vs. energy curves of **1** (a-b) and **2** (c-d).

The UV diffuse spectra of **1** and **2** are determined in the range of 240 to 800 nm. The absorption peak at around 270 nm can be ascribed to the charge transfer of O→Ta. The two characteristic absorption peaks in the range of 400 and 700 nm can be attributed to organic amine ligands and oxalate to metal charge transfer and *d-d* transitions of cobalt complexes. The  $E_g$  values of **1** and **2** are 2.56 eV and 2.65 eV.

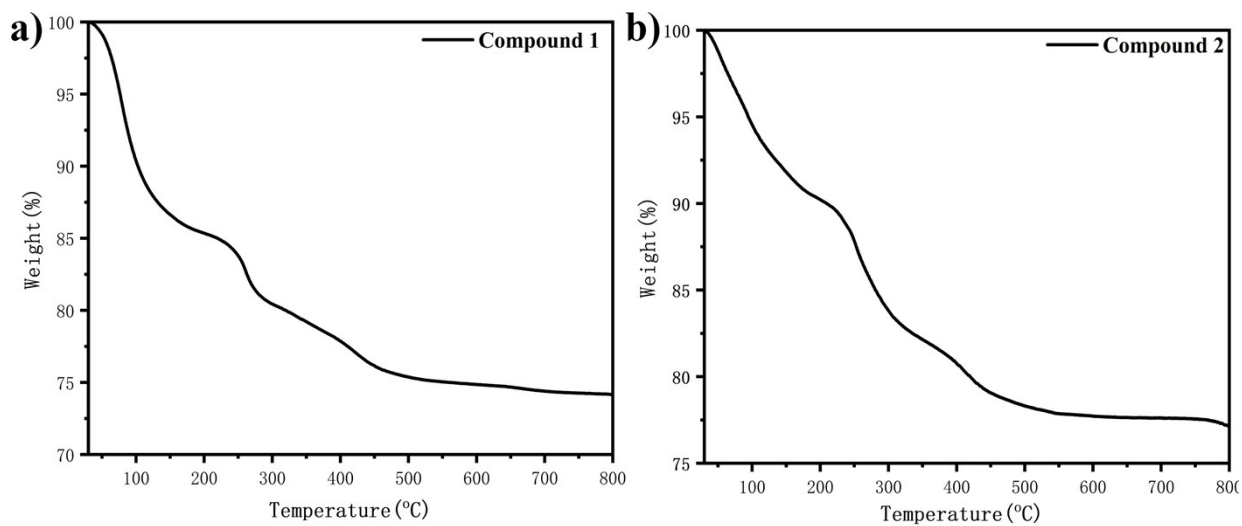

Fig. S12 TG curves of 1 and 2.

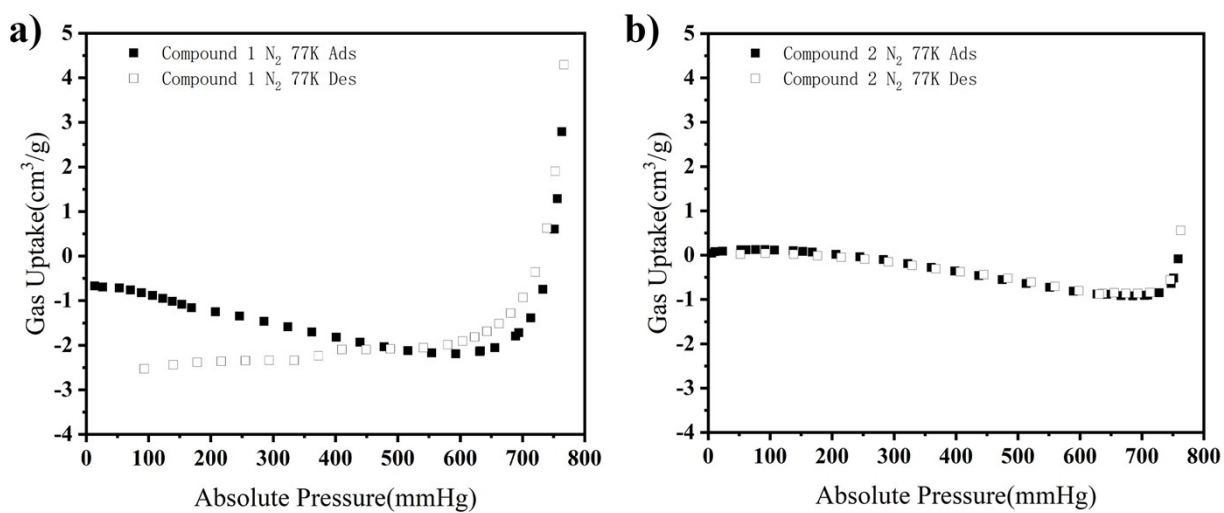

Fig. S13 N<sub>2</sub> adsorption isotherms of 1 and 2.



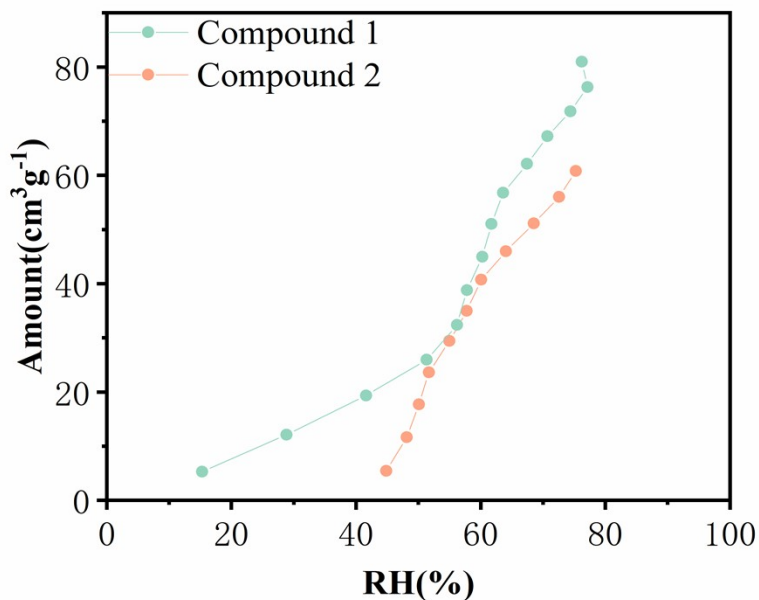

**Fig. S14** Water vapor adsorption curve of samples **1** and **2** as a function of  $p/p_0$ .

The weight losses in the TGA curves indicate that the extra-framework species in compounds **1** and **2** were removed as the temperatures increased (Fig. S12). Furthermore, no  $N_2$  uptakes were observed at 77 K for compounds **1** and **2** (Fig. S13), but they show moderate water vapor adsorption capacities (Fig. S14). Actually, POM cluster-based porous materials show no  $N_2$  uptake capacities but have water vapor adsorption capacities that have been reported.<sup>S16</sup> Therefore, combining the single-crystal data, the TGA, the gas adsorption, and water vapor adsorption results, compounds **1** and **2** can be considered as potential porous materials.

## References

- S1 Z. Li, L. D. Lin, H. Yu, X. X. Li and S. T. Zheng, *Angew. Chem. Int. Ed.*, 2018, **57**, 15777.
- S2 W.J. Liu, L.Z. Dong, R.H. Li, Y.J. Chen, S.N. Sun, S.L. Li, Y.Q. Lan, *ACS Appl. Mater. Interfaces.*, 2019, **11**, 7030.
- S3 P. Yang, M. Alsufyani, A. H. Emwas, C. Q. Chen and N. M. Khashab, *Angew. Chem. Int. Ed.*, 2018, **57**, 13046.
- S4 L. Yang, P. T. Ma, Z. Zhou, J. P. Wang and J. Y. Niu, *Inorg. Chem.*, 2013, **52**, 8285.
- S5 X. L. Cao, S. L. Xie, S. L. Li, L. Z. Dong, J. Liu, X. X. Liu, W. B. Wang, Z. M. Su, W. Guan and Y. Q. Lan, *Chem.-Eur. J.*, 2018, **24**, 2365.
- S6 M. H. Zhu, T. Iwano, M.J. Tan, D. Akutsu, S. Uchida, G. Y. Chen, X. K. Fang, *Angew. Chem.Int. Ed.*, 2022, **61**, e202200666.
- S7 Q. P. Peng, S. J. Li, R. Y. Wang, S. X. Liu, L. H. Xie, J. X. Zhai, J. Zhang, Q. Y. Zhao and X. N. Chen, *Dalton Trans.*, 2017, **46**, 4157.
- S8 Z. Li, J. Zhang, L. D. Lin, J. H. Liu, X. X. Li and S. T. Zheng, *Chem. Commun.*, 2019, **55**, 11735-11738.
- S9 J. Miao, Y. W. Liu, Q. Tang, D. F. He, G. C. Yang, Z. Shi, S. X. Liu and Q. Y. Wu, *Dalton Trans.*, 2014, **43**, 14749.
- S10 M. L. Wei, Y. X. Wang and X. J. Wang, *J. Solid State Chem.*, 2014, **209**, 29.
- S11 J. C. Liu, Q. Han, L. J. Chen, J. W. Zhao, C. Streb and Y. F. Song, *Angew. Chem. Int. Ed.*, 2018, **57**, 8416.
- S12 J. Li, X. L. Cao, Y. Y. Wang, S. R. Zhang, D. Y. Du, J. S. Qin, S. L. Li, Z. M. Su and Y. Q. Lan, *Chem.-Eur. J.*, 2016, **22**, 9299.
- S13 M. L. Wei, P. F. Zhuang, H. H. Li and Y. H. Yang, *Eur. J. Inorg. Chem.*, 2011, **2011**, 1473.
- S14 S. Uchida, R. Hosono, R. Eguchi, R. Kawahara, R. Osuga, J. N. Kondo, M. Hibino, N. Mizuno, *Phys. Chem. Chem. Phys.*, 2017, **19**, 29077.
- S15 X. Liu, D. Zhang, L. Li, X. Sun, L. Zhang, H. Yuan, *Dalton Trans.*, 2017, **46**, 9103.
- S16 Z.-K. Zhu, Y.-Y. Lin, H. Yu, X.-X. Li, S.-T. Zheng, *Angew. Chem. Int. Ed.* 2019, **58**, 16864.
